1 Title

2

## **Time-locked inhibition of covert orienting**

3

4 Authors

5

Antimo Buonocore<sup>1,2\*</sup>, Niklas Dietze<sup>3\*</sup>, Robert D. McIntosh<sup>3</sup>

6

\*equal contribution

7

1. Werner Reichardt Centre for Integrative Neuroscience, Tübingen University, Tübingen,

8

BW, 72076, Germany

9

2. Hertie Institute for Clinical Brain Research, Tübingen University, Tübingen, BW, 72076,

10

Germany

11

3. Human Cognitive Neuroscience, University of Edinburgh, Edinburgh, UK

12

13

14 Corresponding author:

15

Antimo Buonocore

16

Werner Reichardt Centre for Integrative Neuroscience

17

Otfried-Müller Str. 25

18

Tübingen, 72076, Germany

19

Tel: +49 7071 29 88821

20

[antimo.buonocore@cin.uni-tuebingen.de](mailto:antimo.buonocore@cin.uni-tuebingen.de)

21

22 **Abstract**

23 It is well known that visual transients can abolish the execution of an eye movement about  
24 90 ms later, a phenomenon known as saccadic inhibition (SI). But it is not known if the  
25 same inhibitory process might influence covert orienting in the absence of saccades, and  
26 consequently alter visual perception. We measured orientation discrimination performance  
27 in 14 participants during a covert orienting task (modified Posner paradigm) in which an  
28 uninformative exogenous visual cue preceded the onset of an oriented probe stimulus by  
29 120 to 306 ms. In half of the trials the onset of the probe was accompanied by a brief  
30 irrelevant flash, a visual transient that would normally induce SI in an overt task. We report  
31 a SI-like time-specific covert inhibition effect in which the irrelevant flash impaired  
32 orientation discrimination accuracy only when the probe followed the cue between 165 to  
33 265 ms. The interference was more pronounced when the cue was incongruent with the  
34 probe location. We suggest that covert orienting may be susceptible to similar inhibitory  
35 mechanisms that generate SI in overt orienting, although the precise time course and  
36 mechanisms of this novel effect require further characterisation.

37

38 **Keywords:** covert orienting, visual interference, saccadic inhibition, covert inhibition

## 39 **Introduction**

40 The primary function of visual processing is to guide efficient interactions with the  
41 surrounding world. This requires us to rapidly integrate new sensory information with  
42 ongoing motor behaviour to generate appropriate responses such as inhibiting a  
43 previously planned action in order to orient to a novel stimulus. One of the most striking  
44 examples of the fast integration of visual information into a motor command is saccadic  
45 inhibition (Bompas and Sumner 2011; Buonocore and McIntosh 2008; Buonocore and  
46 McIntosh 2012; Edelman and Xu 2009; Reingold and Stampe 1999; Reingold and Stampe  
47 2002). It has been consistently observed that visual transient events interrupt ongoing eye  
48 movement behaviour, such that saccades that would otherwise be launched about 90 ms  
49 later are inhibited, or delayed. This is visualized as a distinct dip in saccadic frequency  
50 around 90 ms after the onset of the visual event, and followed by a rebound period in  
51 which the probability of making an eye movement is increased (Reingold and Stampe  
52 2002). Despite being one of the most reliable phenomenon discovered in oculomotor  
53 behaviour, the ecological function of saccadic inhibition is not fully understood.

54 We recently asked whether this interruption of ongoing oculomotor behaviour might  
55 have functional benefits in terms of facilitating overt reorienting to a new location in space  
56 (Buonocore et al. 2017b). For this purpose, we adapted the well-known double-step  
57 paradigm (Becker and Jürgens 1979; Lisberger et al. 1975), asking participants to make  
58 an eye movement in response to a sudden-onset visual target, which sometimes jumped  
59 to a new location before the first saccade could be launched. Critically, in half of the trials  
60 the jump was accompanied by the presentation of a brief (30 ms) visual flash at the top  
61 and bottom of the screen. These “flash-jump” trials induced strong saccadic inhibition, and  
62 led to a higher rate of successful reorienting to the new target location. We suggested that  
63 saccadic inhibition allowed the oculomotor system the time for a decisional process to  
64 change response plan. Following this empirical demonstration, new models of saccadic

65 inhibition have been proposed, aiming to unify inhibition with the reorienting behaviour  
66 observed in countermanding tasks (Bompas et al. 2020; Salinas and Stanford 2018).  
67 These findings and models have advanced our understanding of the oculomotor system  
68 by suggesting the existence of a common inhibitory signal, driven by new visual onsets,  
69 capable of interrupting ongoing orienting behaviour. Nonetheless, they have been  
70 concerned exclusively with overt orienting behaviour (saccades), leaving untouched the  
71 question of whether covert orienting could be similarly affected.

72         Despite being fundamental for vision, moving the eyes is not the only way to  
73 acquire visual information from the surroundings. Numerous studies have shown  
74 perceptual benefits at locations that have been previously cued, even when no eye  
75 movement is made, confirming that it is possible to orient attention covertly (Posner 1980;  
76 see: Posner 2015 for a review). These studies have mostly used simple detection  
77 responses, but covert orienting can also improve the discrimination of spatial frequency and  
78 lower the contrast threshold for orientation discrimination (Barbot et al. 2012; Cameron et  
79 al. 2002; Carrasco 2011; Fernández et al. 2019; Lee et al. 1999; Pestilli and Carrasco  
80 2005; Solomon 2004). Given the strong similarities between the overt and covert process,  
81 we ask whether the phenomenon of saccadic inhibition, which arises with striking  
82 regularity in overt responses, extends to covert orienting behaviour. We operationalised  
83 covert orienting in terms of its perceptual consequences, specifically modulations in the  
84 ability to discriminate a visual feature (orientation) at a cued or an uncued location. The  
85 key question was whether an irrelevant flash, which would induce SI in overt tasks,  
86 interferes with perceptual discrimination in a covert task. For this purpose, we adapted our  
87 previously-used double-step saccadic task (Buonocore et al. 2017b), to create a novel  
88 covert orienting task suitable for testing the inhibitory influence of an irrelevant visual  
89 transient. This effectively combined a classic task for the exogenous cueing of covert  
90 attention (Posner 1980) with a saccadic inhibition paradigm.

91

## 92 **Materials and Methods**

93

94 Fourteen participants, aged between 21 and 35 years old (mean = 25.6,  $SD = 3.86$ ), were  
95 included in the data analysis. Four additional participants were excluded after the first  
96 experimental session, based on poor perceptual performance (see Procedure). All  
97 participants were free from neurological and visual impairments. This experiment was  
98 conducted in accordance with the British Psychological Society Code of Conduct, with the  
99 approval of the University of Edinburgh Psychology Research Ethics Committee.

100

### 101 *Apparatus and stimuli*

102 Stimuli were generated using MATLAB R2017b (MathWorks, Inc.) and Psychophysics  
103 Toolbox 3.0.14 (Brainard 1997). All the stimuli were in grey scale on a grey background  
104 ( $20.6 \text{ cd/m}^2$ ), presented on a 19-inch CRT monitor with a refresh rate of 75 Hz (13.3 ms  
105 temporal resolution). Participants were seated in front of the monitor at a viewing distance  
106 of 79.5 cm with their head on a chinrest and their eyes aligned with the centre of the  
107 screen. The fixation point was a small white dot of 0.05 degrees radius ( $84.9 \text{ cd/m}^2$ ). The  
108 cue was a filled white circle of 0.2 degrees radius at full contrast ( $84.9 \text{ cd/m}^2$ ), at an  
109 eccentricity of 10 degrees from the fixation point and 1.5 degrees above the centre of the  
110 possible probe location on that side (e.g. Pestilli and Carrasco 2005). The probe stimulus  
111 was a tilted Gabor patch with a radius of 0.55 degrees, a contrast of 0.2 and a spatial  
112 frequency of 1.78 c/deg, 10 degrees to the left or right of the fixation point. Eye  
113 movements were monitored with a tower-mount Eyelink 1000 system tracking the right  
114 eye, at a sampling rate of 1000 Hz. Manual responses were recorded by button presses  
115 on a custom response pad. The room was dark, except for the display monitor, and the  
116 operator monitor located behind the participant and facing away from them. Each

117 participant completed two testing sessions on separate days lasting about one hour each  
118 including breaks. The first testing session involved a practice block, a QUEST procedure  
119 for orientation threshold (repeated up to three times), and 19 blocks of experimental trials.  
120 The second testing session comprised only the 19 blocks of experimental trials.

121

## 122 *Procedure*

123 At the beginning of each experimental testing session, the practice block and the QUEST  
124 procedure, a 9-point calibration was conducted. Calibrations were repeated if the average  
125 error across all points was greater than 0.5 degrees, and after every 200 trials. In both the  
126 QUEST and the main experimental trials, participants were instructed to fixate the fixation  
127 point at the centre of the screen throughout the trial and to report the orientation of the  
128 Gabor patch (left or right tilted) by pressing with the button under their left or right index  
129 finger respectively. We used discrimination of orientation so that the exogenous cue was  
130 orthogonal to the features of the stimulus, providing a measure of modulations in  
131 sensitivity. Speed of responding was not emphasised. If participants moved their eyes  
132 outside of a fixation window of 3 degrees radius, the trial was aborted and randomly  
133 reshuffled into the remaining trial sequence.

134 At the start of the experimental procedure in the first session, to familiarise with the  
135 basic task, participants first performed a practice block of 16 trials in which the onset of a  
136 cue was followed after a random delay by the onset of a probe at the same spatial location  
137 (congruent cue condition). The practice block was followed by a QUEST staircase  
138 procedure (Watson and Pelli 1983) to identify a suitable orientation per participant that  
139 avoided floor or ceiling levels of discrimination. The trial sequence for the QUEST followed  
140 the same structure as the subsequent experimental trials (description below), for a  
141 maximum of 80 trials, but only congruent cue conditions were used. The QUEST  
142 parameters were set to a 75% performance criterion, a beta of 1.5, and a grain of 1. If the

143 estimated threshold orientation was greater than 15 degrees, the QUEST was run again  
144 up to a maximum of three times. Participants were excluded from the main experiment if  
145 they still had an outcome greater than 15 degrees after the third QUEST, or if at the end of  
146 the whole first session their average performance in experimental trials was below 60%.  
147 Four participants were excluded on this basis.

148 The experimental task was an adaptation of the classic cue Posner paradigm for  
149 covert perceptual judgements, modified to mimic the structure of Experiment 3 in  
150 Buonocore et al. (2017b) for overt eye movement responses (Fig. 1A). Each trial began  
151 with the onset of a white fixation dot. After a random interval between 800 ms and 1200  
152 ms, the cue was presented for 53.3 ms to the left or right of fixation. The probe was  
153 presented for 106.6 ms after a cue-target onset asynchrony (CTOA) determined at random  
154 between 120 and 306.6 ms, with equal numbers of trials at the cued location (*congruent*  
155 *cue condition*) or at the uncued location (*incongruent cue condition*). On half of the trials, a  
156 black flash ( $0.34 \text{ cd/m}^2$ ) covering the bottom and top thirds of the screen was presented for  
157 13.3 ms simultaneously with the onset of the probe. This technique was introduced by  
158 Reingold and Stampe (2002) as a way to induce saccadic inhibition without interfering with  
159 the localization of a saccade target. It was recently adapted to saccade tasks requiring a  
160 concurrent perceptual response (Buonocore et al. 2016; Buonocore and Melcher 2015),  
161 establishing a lack of masking effects of this remote flash on probe perception. It is  
162 interesting to note that although the flash was a salient change, it was extremely brief, and  
163 most participants on questioning did not notice it at all.

164 The main experiment had four probe conditions: congruent (25%), congruent plus  
165 flash (25%), incongruent (25%) and incongruent plus flash (25%). Participants completed  
166 a total of 38 blocks of experimental trials across the two test sessions. Within each block,  
167 there were 16 trials, four trials per probe condition by two probe locations (left and right)

168 and two probe tilts (left and right). Each participant thus completed a total of 1216 valid  
169 trials, resulting in 304 trials per probe condition (collapsed across side, tilt, and CTOA).  
170

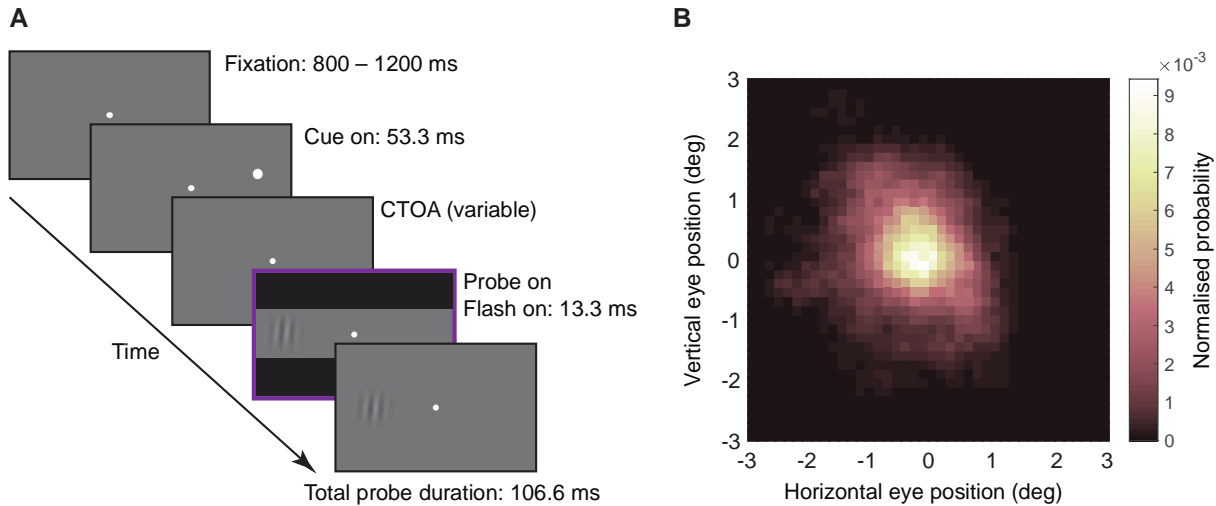

171  
172

173 **Figure 1. (A)** Trial scheme. Each trial started with the onset a fixation point. After a random interval  
174 between 800 to 1200 ms, a white dot cue was presented for 53.3 ms at 10 degrees to one side of  
175 fixation. After a random interval between 120 to 306.6 ms after cue onset (CTOA), the probe was  
176 presented for 106.6 ms either at the same (congruent) or the opposite (incongruent) location as the  
177 cue. On half of the trials, a flash appeared with the onset of the probe covering the bottom and top  
178 thirds of the screen for 13.3 ms. Here we show the example of an incongruent plus flash trial.  
179 Stimuli are not drawn to scale. **(B)** Raw eye movement positions across all subjects during the  
180 period of stable fixation between 200 ms before cue onset to 200 ms after probe onset. The  
181 fixation interval spanned from a minimum duration of 515 ms and maximum of 715 ms, depending  
182 upon the CTOA. From the figure it is clear that participants were accurately maintaining stable  
183 fixation at the centre of the screen (light colours centred around zero in both the vertical and  
184 horizontal axis).  
185

### 186 *Data processing and analysis*

187 We collected a total of 17024 trials across all included participants. Eye movement  
188 flagging was performed in a semi-automatic fashion, with the supervision of an  
189 experienced researcher (AB). Eye movements, saccades and microsaccades, were  
190 detected automatically based on velocity and acceleration thresholds of 15 deg/s and 450  
191  $\text{deg/s}^2$  respectively, then all trials were manually inspected and adjusted. Samples in  
192 which the eye signal was unstable or lost were flagged as “bad data”, and any trial  
193 containing bad samples was excluded (13%). From the total of trials with good eye  
194 movement signals, we further excluded trials in which participants responded with manual



195 reaction times less than 200 ms (4.4%) or more than 3.5 standard deviation above their  
196 average response latency across the entire experiment (1.2%), leaving a total of 16044  
197 good trials. To remove possible confounds in our results due to microsaccades (e.g. Hafed  
198 2013), we also removed all trials with microsaccades detected between 200 ms before cue  
199 onset and 200 ms after probe onset (1633 trials removed, 10.17% of the good trials). This  
200 defined an interval of stable fixation of minimum duration 515 ms and maximum duration  
201 715 ms, depending upon the CTOA (Fig. 1B). For the remaining trials (N = 14411),  
202 incorrect responses were coded as 0 and correct responses as 1. We then used a mixed-  
203 effects logistic regression to test the influence of cue (congruent, incongruent), flash (no  
204 flash, flash), and CTOA (four bins centred on 140, 190, 240, 290 ms) on perceptual  
205 performance.

206 All data pre-processing and statistical analyses were conducted with custom scripts  
207 in MATLAB R2019a (MathWorks, Inc.). The entire dataset after trial exclusion is uploaded  
208 in the Open Science Framework archive at the following link:

209 [https://osf.io/9fnh4/?view\\_only=14b0ae67d49c4c1aa4898f66f20b473b](https://osf.io/9fnh4/?view_only=14b0ae67d49c4c1aa4898f66f20b473b)

210

## 211 **Results**

212

213 The present experiment follows up the recent findings in which we reported that inducing  
214 saccadic inhibition during oculomotor programming in a variant of a double-step paradigm  
215 (Becker and Jürgens 1979) could facilitate saccade reorienting behaviour (Buonocore et  
216 al. 2017b). Based on the findings for overt saccade responses, we asked if covert  
217 orienting, that we conceptualize in the framework of premotor preparation (Rizzolatti et al.  
218 1987; Sheliga et al. 1994; Sheliga et al. 1995), could be subjected to similar inhibitory  
219 processes triggered by flash onset and which repercussion such “covert inhibition” would  
220 have on perceptual judgements. Our hypothesis is that flash onset might hinder covert

221 orienting capabilities in a specific time window, similar to how the sudden presentation of a  
222 visual stimulus can reset saccade programming about 90 ms later (Buonocore and  
223 McIntosh 2008; Reingold and Stampe 1999; Reingold and Stampe 2002). To test this  
224 hypothesis, we ran a mixed-effects logistic regression to investigate how perceptual  
225 response accuracy (0,1) was modulated by *Cue* type (congruent, incongruent), *Flash* (no  
226 flash, flash), *CTOA* (140 ms, 190 ms, 240 ms, 290 ms, representing bin center) and by the  
227 interaction between *Flash* and *CTOA*. It was not possible to include the full set of  
228 interactions because it would lead the model to fail to converge. The model is summarized  
229 in Equation 1 in Wilkinson notation (Wilkinson and Rogers 1973):

230

$$\text{Eq. 1: } \textit{Response} = \textit{Cue} + \textit{Flash} * \textit{CTOA} + (1 | \textit{Subjects})$$

231

232 As expected, we found a strong main effect of *Cue* ( $\beta = -0.165$ , 95% CI = [-0.243, -0.087],  
233  $t = -4.150$ ,  $p = 3.338 \times 10^{-5}$ ) confirming better orientation discrimination for congruently cued  
234 than for incongruently cued probes (Cameron et al. 2002). Overall, the cueing effect  
235 corresponded to an increase of about 3.5% in discrimination performance when cue  
236 location matched the following probe location. For clarity, in Figure 2A we show the mean  
237 accuracy for each condition across all CTOAs. From the figure it is clear that on average  
238 the congruent cue conditions (green and blue lines) produced better orientation  
239 discrimination than the incongruent cue condition (yellow and purple lines). The analysis  
240 also revealed an interaction between *Flash* and *CTOA* such that perceptual performance  
241 was disrupted in flash trials (Fig. 2A, blue and purple lines) compared to no flash ones  
242 (Fig. 2A, green and yellow lines), when the cue preceded the probe with a delay of 190 ms  
243 ( $\beta = -0.286$ , 95% CI = [-0.499, -0.074],  $t = -2.643$ ,  $p = 0.008$ ) and 240 ms ( $\beta = -0.269$ , 95%  
244 CI = [-0.498, -0.040],  $t = -2.305$ ,  $p = 0.021$ ). Figure 2B illustrates this interaction, plotting

245 the difference between flash and no flash trials (irrespective of cue). Perceptual  
246 discrimination in the middle bins of the CTOA range was reduced by about 4%.

247 The trend for each condition across time in Figure 2A suggests that the effect of the  
248 flash may be mostly driven by the incongruent cue condition (yellow line), rather than the  
249 congruent cue condition (blue line). We explored this pattern by running two separate  
250 mixed-effects logistic regressions to test the influence of Flash and CTOA, and their  
251 interaction, on the congruent and incongruent trials. There were no significant effects for  
252 the congruent cue condition, including in the interaction term at any of the CTOAs, while  
253 there was an interaction in the incongruent cue condition with a strong effect of the flash at  
254 190 ms ( $\beta = -0.348$ , 95% CI = [-0.646, -0.050],  $t = -2.292$ ,  $p = 0.022$ ) and 240 ms ( $\beta = -$   
255  $0.393$ , 95% CI = [-0.716, -0.071],  $t = -2.389$ ,  $p = 0.017$ ). While this analysis does not  
256 formally establish a three-way interaction, it is consistent with a stronger inhibitory  
257 influence of the flash in incongruent trials, specific to the two middle time bins (190, 240  
258 ms).

259

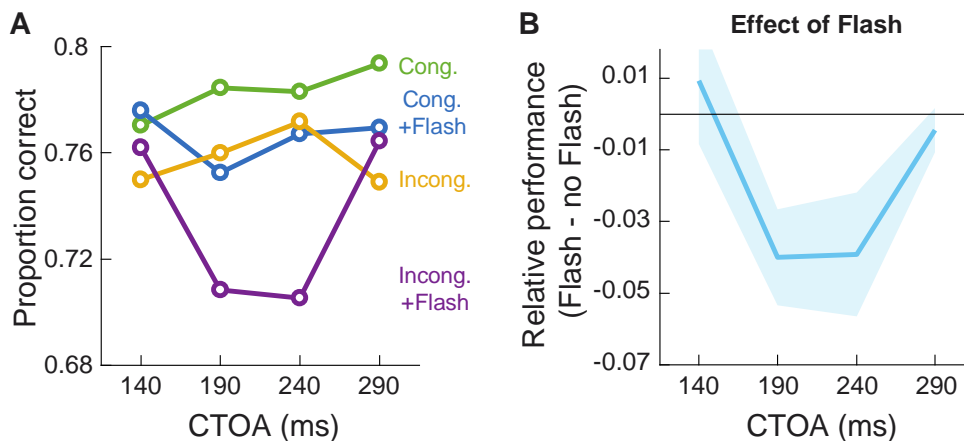

260

261 **Figure 2. (A)** Perceptual performance. Congruent cues (green and blue lines) lead to better  
262 performance than incongruent cues (yellow and purple lines). Flash onset (blue and purple lines)  
263 interfered with orienting behaviour reducing accuracy relative to trials in which the flash was absent  
264 (green and yellow lines respectively). The effect was more pronounced when the cue was  
265 presented 190 to 240 ms before probe onset and for the incongruent condition (purple line). **(B)**  
266 Relative effect of the flash calculated as accuracy for flash trials minus no flash trials. A clear  
267 decrease in perceptual discrimination is visible for the middle range CTOAs. Shaded areas  
268 represent one standard error of the mean.

269

270 This pattern is clearly evident in Figure 3, where we show the raw data points of our  
271 individual participants, contrasting the no flash against flash condition at each CTOA for  
272 both the congruent (Fig.3A, top row panels) and the incongruent (Fig.3B, bottom row  
273 panels) cue condition separately. The figure clarifies that perceptual performance in the  
274 congruent cue condition was at most only lightly affected by the flash (decrease in  
275 performance observed in 8 out of 14 participants), in the two middle CTOA bins (190, 240  
276 ms). On the other hand, in the incongruent cue condition at the mid CTOAs such shift was  
277 stronger (decrease in performance observed in 11 and 12 out of 14 participants  
278 respectively).

279

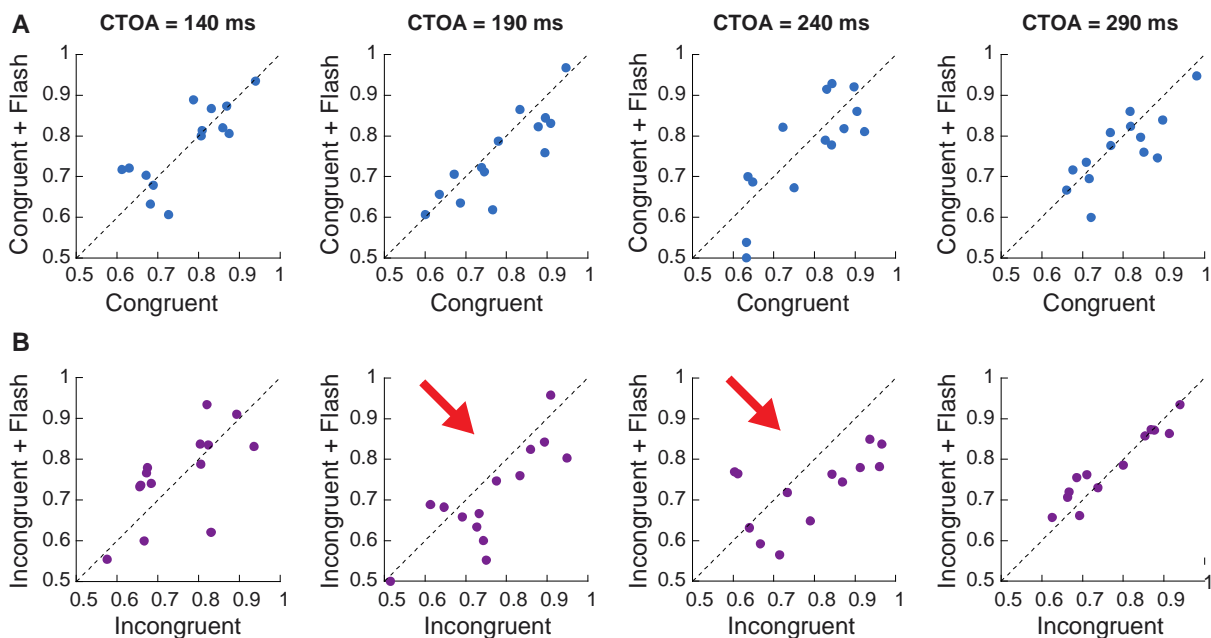

280

281 **Figure 3.** Raw data points of individual participants contrasting the no flash condition against flash  
282 condition at each CTOA for the congruent (A) and incongruent (B) cue condition. Dotted lines  
283 represents the unity slope line. At CTOA 190, there is a weak decrease in performance in the  
284 congruent cue condition when the flash was present. Such decrease was much stronger and  
285 sustained in the incongruent cue condition at both CTOAs of 190 ms and 240 ms (red arrow). Early  
286 and late CTOAs did not show any difference for trials with or without flash.

287

288 **Discussion**

289

290 In the present manuscript, we uncovered a new phenomenon within a classic cueing  
291 paradigm (Cameron et al. 2002; Posner 1980) in which the visual discrimination for a  
292 probe stimulus was deteriorated by the simultaneous presentation of a brief flash event,  
293 but only when the flash was preceded by the exogenous cue between 165 to 265 ms. The  
294 effect was particularly emphasised for the condition in which cue location was incongruent  
295 with the location of the incoming probe. We suggest that the buildup of attentional  
296 resources at a cue location has a specific temporal window in which an inhibitory signal  
297 can interfere, leading to a “covert inhibition” effect. The mechanisms behind the inhibitory  
298 process might share similar characteristics with to the ones observed in the well-known  
299 phenomenon of SI for overt saccadic responses (Bompas and Sumner 2011; Buonocore  
300 and McIntosh 2008; Buonocore and McIntosh 2012; Edelman and Xu 2009; Reingold and  
301 Stampe 1999; Reingold and Stampe 2002) in which the flash stops the premotor buildup  
302 activity of Superior Colliculus neurons for a saccadic eye movement (Dorris et al. 2007)  
303 probably after reactivation of neurons gating saccades within the low brainstem  
304 oculomotor nuclei (Omnipause neurons, Büttner-Ennever et al. 1988; Keller 1974)  
305 (Buonocore et al. 2020; Buonocore et al. 2017a), but only within a tight temporal window  
306 before movement execution. However, the exact time course and which aspects of the  
307 covert orienting process are subjected to interference requires further investigation.

308 Based on the general SI framework (Reingold and Stampe 2002) and our previous  
309 findings on saccades (Buonocore et al. 2017b), we expected flash onset to interfere with  
310 covert orienting behaviour in a specific time window, inducing an SI-like inhibition effect.  
311 Beyond this, if the pattern of covert orienting was strictly following that of overt orienting as  
312 observed in our previous study, we would have expected this interruption to improve the  
313 ability to re-orient to the opposite (uncued) location, giving a relative enhancement of  
314 perceptual discrimination for incongruently cued targets. In this respect, the effect would  
315 have been the perceptual counterpart to the higher rate of successful reorienting saccades

316 observed when SI was boosted in “flash-jump” trials in the overt task. The other prediction  
317 was that perceptual performance at congruent cue locations might have been slightly  
318 impaired.

319 Although our results confirm that the effect of the flash was time-locked to some  
320 components of the covert shift, the direction of the effect was contrary to our initial  
321 expectation. Rather than impairing orienting behaviour (congruent condition), the flash  
322 impaired the reorienting process (incongruent condition) reducing perceptual capabilities  
323 at the uncued location. This finding can perhaps be informed by the idea that reorienting  
324 following interruption after a transient event carries a small temporal cost (see reorienting  
325 latency for Experiment 3, Table 3 in: Buonocore et al. 2017b). We suggest that in our  
326 covert paradigm the flash might have introduced a similar delay during covert orienting,  
327 requiring more time to redirect to the uncued location. Given the brevity of the probe  
328 stimulus to be discriminated (106 ms), this small delay may have been enough to reduce  
329 resources at the probe location and consequently deteriorate sensitivity for the probe  
330 stimulus (Salinas and Stanford 2018). That is, while orienting (to the cued location) in our  
331 design might have been mostly or wholly completed within 100 ms, and so invulnerable to  
332 interruption by a flash, reorienting (in incongruent trials) occurred later, and was vulnerable  
333 to interruption, reducing the opportunity to process the brief probe stimulus.

334 It is important to emphasise that the interruption effect was restricted to the central  
335 CTOA times (165-265 ms), despite the fact that the flash was always simultaneous with  
336 the probe. This time-specificity rules out the possibility that passive masking mechanisms  
337 (Alpern 1952; Breitmeyer and Ogmen 2000) could account for the deterioration of probe  
338 discrimination; if masking were responsible, then the appearance of the flash simultaneous  
339 with the probe would always lead to the same impairment, across all experimental  
340 conditions. A precise answer to why the effect was specific for the mid-range CTOAs  
341 would required to investigate which specific components of the orienting process were

342 affected by the flash. Unfortunately, the current data can not answer this point, since we  
343 have a limited CTOA time period that does not show the whole development of facilitation  
344 and inhibition following the cue. Nonetheless, our data provide a few hints to answer this  
345 question. Looking at Figure 2A, it safe to hypothesise that at the first CTOA both covert  
346 orienting (congruent cue condition) and reorienting (incongruent cue condition) could be  
347 successfully executed. This data point highlights that the covert shifts could quickly  
348 complete one cycle of orienting, toward the cue and back, within 165 ms. A similar  
349 observation can be made by looking at the microsaccade triggered after cue onset (Fig.  
350 S1A) which are a strong biomarker of covert attentional allocation (Engbert and Kliegl  
351 2003; Hafed 2013). Again, within 150 ms, microsaccades would orient toward the cue and  
352 back, with their direction biased towards the cue (Fig. S1B) (Hafed and Ignashchenkova  
353 2013; Malevich et al. 2020; Tian et al. 2016).

354 These data suggest that covert shifts following cue onset were moving with a  
355 certain periodicity, that we can estimate from our data to be about 150 ms. In support of  
356 this observation, recent theories of attentional allocation suggest that orienting is not a  
357 monotonic process but rather a dynamic sampling of spatial locations started by the onset  
358 of a lateralised stimulus with a periodicity between 200 to 250 ms depending on the  
359 experimental design (Bellet et al. 2017; Helfrich et al. 2018; Landau and Fries 2012; Song  
360 et al. 2014; VanRullen et al. 2007). We suggest that the inhibitory process we recorded  
361 may reflect interference in a specific phase of this rhythmic process between spatial  
362 locations, with the first sensitive time being after the first cycle of sampling, that in our  
363 paradigm would be at around 220 ms. Earlier time points at ~70 ms as well as later time  
364 points ~360 ms would be also expected to be suitable for interference. We recognise that  
365 the rhythmicity was hidden in our no flash conditions probably because of the mild cueing  
366 effect of our paradigm (but see Fig. S2 for a higher temporal resolution of the effect).

367           Taking together these observations, we can draw some predictions from our data to  
368   apply to future research work on “covert inhibition” effects. One main hypothesis is that the  
369   flash would always alter perceptual performance when it is time-locked to the ongoing  
370   covert process triggered by the cue. The time-locking point could be determined by  
371   estimating the time at which the covert shift would engage or disengage from the cue. This  
372   point in time can be inferred by looking at how microsaccades are attracted by the cue as  
373   well as the full time course of facilitation and inhibition in no flash trials. A corollary of this  
374   hypothesis is that the time interval between cue onset and probe onset should be  
375   irrelevant to observe “covert inhibition” effects, that should always manifest as far as the  
376   flash can intercept the timing of the covert shift. This mechanisms is in fact similar to the  
377   time-locked interference of the flash relative to saccadic reaction times. Finally, the  
378   interference is expected to affect both congruent and incongruent orienting processes, but  
379   the magnitude of the effect might be modulated by the more general cueing effect. Covert  
380   inhibition effects are then expected to also extend to paradigms in which presaccadic shift  
381   of attentions are involved, altering the strong benefits of coupling covert orienting with eye  
382   movements.  
383



384 **References**

- 385
- 386 Alpern M (1952) Metacontrast; historical introduction *Am J Optom Arch Am Acad Optom*
- 387 29:631-646
- 388 Barbot A, Landy MS, Carrasco M (2012) Differential effects of exogenous and
- 389 endogenous attention on second-order texture contrast sensitivity *J Vis* 12
- 390 doi:10.1167/12/8/6
- 391 Becker W, Jürgens R (1979) An analysis of the saccadic system by means of double step
- 392 stimuli *Vision Research* 19:967-983 doi:10.1016/0042-6989(79)90222-0
- 393 Bellet J, Chen C-Y, Hafed ZM (2017) Sequential hemifield gating of alpha and beta
- 394 behavioral performance oscillations after microsaccades *Journal of*
- 395 *Neurophysiology*:jn.00253.02017-00265 doi:10.1152/jn.00253.2017
- 396 Bompas A, Campbell AE, Sumner P (2020) Cognitive control and automatic interference in
- 397 mind and brain: A unified model of saccadic inhibition and countermanding *Psychol*
- 398 *Rev* doi:10.1037/rev0000181
- 399 Bompas A, Sumner P (2011) Saccadic inhibition reveals the timing of automatic and
- 400 voluntary signals in the human brain *J Neurosci* 31:12501-12512
- 401 doi:10.1523/JNEUROSCI.2234-11.2011
- 402 Brainard DH (1997) The Psychophysics Toolbox *Spatial Vision* 10:433-436
- 403 doi:10.1163/156856897X00357
- 404 Breitmeyer BG, Ogmen H (2000) Recent models and findings in visual backward masking:
- 405 a comparison, review, and update *Percept Psychophys* 62:1572-1595
- 406 doi:10.3758/bf03212157
- 407 Buonocore A, Baumann MP, Hafed ZM (2020) Visual pattern analysis by motor neurons
- 408 (Abstract) *Computational and Systems Neuroscience (Cosyne)* 147
- 409 Buonocore A, Chen C-Y, Tian X, Idrees S, Münch TA, Hafed ZM (2017a) Alteration of the
- 410 microsaccadic velocity-amplitude main sequence relationship after visual transients:
- 411 implications for models of saccade control. *Journal of Neurophysiology* 117:1894-
- 412 1910 doi:10.1152/jn.00811.2016
- 413 Buonocore A, McIntosh RD (2008) Saccadic inhibition underlies the remote distractor
- 414 effect *Experimental brain research Experimentelle Hirnforschung Expérimentation*
- 415 *cérébrale* 191:117-122 doi:10.1007/s00221-008-1558-7
- 416 Buonocore A, McIntosh RD (2012) Modulation of saccadic inhibition by distractor size and
- 417 location *Vision Research* 69:32-41 doi:10.1016/j.visres.2012.07.010
- 418 Buonocore A, McIntosh RD, Melcher D (2016) Beyond the point of no return: effects of
- 419 visual distractors on saccade amplitude and velocity *Journal of Neurophysiology*
- 420 115:752-762 doi:10.1152/jn.00939.2015
- 421 Buonocore A, Melcher D (2015) Interference during eye movement preparation shifts the
- 422 timing of perisaccadic compression *Journal of Vision* 15:3 doi:10.1167/15.15.3
- 423 Buonocore A, Purokayastha S, McIntosh RD (2017b) Saccade Reorienting Is Facilitated
- 424 by Pausing the Oculomotor Program *Journal of cognitive neuroscience* 29:2068-
- 425 2080 doi:10.1162/jocn\_a\_01179
- 426 Büttner-Ennever JA, Cohen B, Pause M, Fries W (1988) Raphe nucleus of the pons
- 427 containing omnipause neurons of the oculomotor system in the monkey, and its
- 428 homologue in man. *Journal of Comparative Neurology* 267:307-321
- 429 doi:10.1002/cne.902670302
- 430 Cameron EL, Tai JC, Carrasco M (2002) Covert attention affects the psychometric function
- 431 of contrast sensitivity *Vision Res* 42:949-967 doi:10.1016/s0042-6989(02)00039-1
- 432 Carrasco M (2011) Visual attention: the past 25 years *Vision Res* 51:1484-1525
- 433 doi:10.1016/j.visres.2011.04.012

- 434 Dorris MC, Olivier E, Munoz DP (2007) Competitive integration of visual and preparatory  
435 signals in the superior colliculus during saccadic programming *J Neurosci* 27:5053-  
436 5062 doi:10.1523/JNEUROSCI.4212-06.2007
- 437 Edelman JA, Xu KZ (2009) Inhibition of Voluntary Saccadic Eye Movement Commands by  
438 Abrupt Visual Onsets *Journal of Neurophysiology* 101:1222-1234  
439 doi:10.1152/jn.90708.2008
- 440 Engbert R, Kliegl R (2003) Microsaccades uncover the orientation of covert attention  
441 *Vision Research* 43:1035-1045 doi:10.1016/S0042-6989(03)00084-1
- 442 Fernández A, Li H-H, Carrasco M (2019) How exogenous spatial attention affects visual  
443 representation *Journal of Vision* 19:4-4 doi:10.1167/19.11.4
- 444 Hafed ZM (2013) Alteration of Visual Perception prior to Microsaccades *Neuron* 77:775-  
445 786 doi:10.1016/j.neuron.2012.12.014
- 446 Hafed ZM, Ignashchenkova A (2013) On the Dissociation between Microsaccade Rate and  
447 Direction after Peripheral Cues: Microsaccadic Inhibition Revisited *Journal of*  
448 *Neuroscience* 33:16220-16235 doi:10.1523/JNEUROSCI.2240-13.2013
- 449 Helfrich RF, Fiebelkorn IC, Szczepanski SM, Lin JJ, Parvizi J, Knight RT, Kastner S (2018)  
450 Neural Mechanisms of Sustained Attention Are Rhythmic *Neuron* 99:854-865.e855  
451 doi:10.1016/j.neuron.2018.07.032
- 452 Keller EL (1974) Participation of Medial Pontine Reticular-Formation in Eye-Movement  
453 Generation in Monkey *Journal of Neurophysiology* 37:316-332
- 454 Landau AN, Fries P (2012) Attention Samples Stimuli Rhythmically *Current Biology*  
455 22:1000-1004 doi:10.1016/j.cub.2012.03.054
- 456 Lee DK, Itti L, Koch C, Braun J (1999) Attention activates winner-take-all competition  
457 among visual filters *Nat Neurosci* 2:375-381 doi:10.1038/7286
- 458 Lisberger SG, Fuchs AF, King WM, Evinger LC (1975) Effect of mean reaction time on  
459 saccadic responses to two-step stimuli with horizontal and vertical components  
460 *Vision Research* 15:1021-1025 doi:10.1016/0042-6989(75)90245-X
- 461 Malevich T, Buonocore A, Hafed ZM (2020) Dependence of the stimulus-driven  
462 microsaccade rate signature on visual stimulus polarity  
463 bioRxiv:2020.2005.2023.112417 doi:10.1101/2020.05.23.112417
- 464 Pestilli F, Carrasco M (2005) Attention enhances contrast sensitivity at cued and impairs it  
465 at uncued locations *Vision Res* 45:1867-1875 doi:10.1016/j.visres.2005.01.019
- 466 Posner MI (1980) Orienting of Attention *Quarterly Journal of Experimental Psychology*  
467 32:3-25 doi:10.1080/00335558008248231
- 468 Posner MI (2015) Orienting of attention: Then and now *Quarterly journal of experimental*  
469 *psychology* (2006):1-12 doi:10.1080/17470218.2014.937446
- 470 Reingold EM, Stampe DM (1999) Saccadic Inhibition in Complex Visual Tasks. In., vol  
471 Chapter 35. Springer US, Boston, MA, pp 249-255. doi:10.1007/978-1-4757-3054-  
472 8\_35
- 473 Reingold EM, Stampe DM (2002) Saccadic Inhibition in Voluntary and Reflexive Saccades  
474 *Journal of cognitive neuroscience* 14:371-388 doi:10.1162/089892902317361903
- 475 Rizzolatti G, Riggio L, Dascola I, Umiltà C (1987) Reorienting attention across the  
476 horizontal and vertical meridians: Evidence in favor of a premotor theory of attention  
477 *Neuropsychologia* 25:31-40 doi:10.1016/0028-3932(87)90041-8
- 478 Salinas E, Stanford TR (2018) Saccadic inhibition interrupts ongoing oculomotor activity to  
479 enable the rapid deployment of alternate movement plans *Scientific Reports*  
480 8:14163 doi:10.1038/s41598-018-32224-5
- 481 Sheliga BM, Riggio L, Rizzolatti G (1994) Orienting of attention and eye movements  
482 *Experimental brain research Experimentelle Hirnforschung Expérimentation*  
483 *cérébrale* 98 doi:10.1007/BF00233988

- 484 Sheliga BM, Riggio L, Rizzolatti G (1995) Spatial attention and eye movements  
485 Experimental brain research Experimentelle Hirnforschung Expérimentation  
486 cérébrale 105 doi:10.1007/BF00240962
- 487 Solomon JA (2004) The effect of spatial cues on visual sensitivity Vision Res 44:1209-  
488 1216 doi:10.1016/j.visres.2003.12.003
- 489 Song K, Meng M, Chen L, Zhou K, Luo H (2014) Behavioral oscillations in attention:  
490 rhythmic  $\alpha$  pulses mediated through  $\theta$  band J Neurosci 34:4837-4844  
491 doi:10.1523/jneurosci.4856-13.2014
- 492 Tian X, Yoshida M, Hafed ZM (2016) A Microsaccadic Account of Attentional Capture and  
493 Inhibition of Return in Posner Cueing Frontiers in Systems Neuroscience 10  
494 doi:10.3389/fnsys.2016.00023
- 495 VanRullen R, Carlson T, Cavanagh P (2007) The blinking spotlight of attention Proc Natl  
496 Acad Sci U S A 104:19204-19209 doi:10.1073/pnas.0707316104
- 497 Watson AB, Pelli DG (1983) Quest: A Bayesian adaptive psychometric method Perception  
498 & Psychophysics 33:113-120 doi:10.3758/BF03202828
- 499 Wilkinson GN, Rogers CE (1973) Symbolic Description of Factorial Models for Analysis of  
500 Variance Journal of the Royal Statistical Society Series C (Applied Statistics)  
501 22:392-399 doi:10.2307/2346786  
502

503

504 **Supplementary material**

505

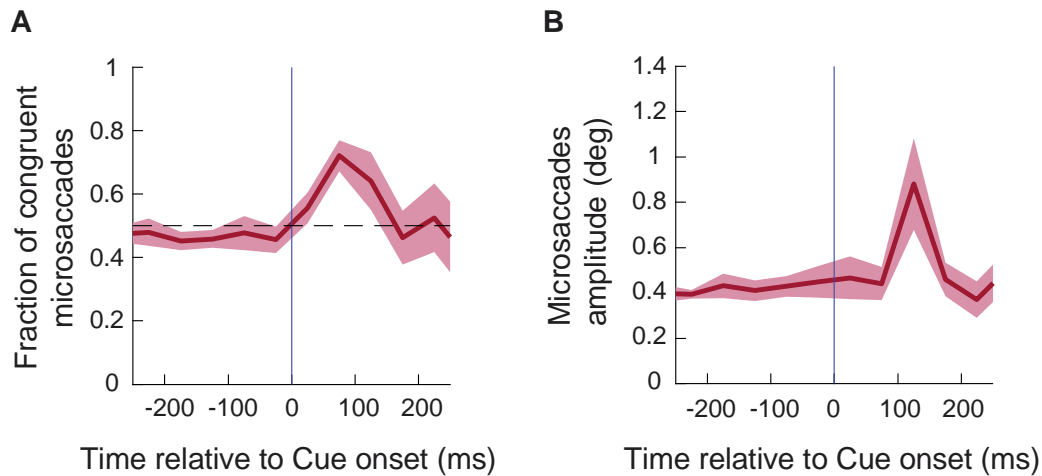

506

507 **Figure S1.** For each participant, we calculated the fraction of microsaccades going toward the cue  
508 **(A)**, and their average amplitude **(B)** for all the conditions pooled together. **(A)** Shortly following  
509 cue onset, microsaccades were directed toward cue location and return to baseline level about 150  
510 ms afterward. Since in half of the trials the cue was presented at the opposite location of the probe  
511 (incongruent cue condition), this pattern suggests that eye movements were biased away from the  
512 location where the perceptual judgment would take place. **(B)** Microsaccades directed toward the  
513 cue showed an approximate doubling in amplitude. In all panels, the thick line represents the  
514 average across participants and the shaded area represents one standard error of the mean.  
515

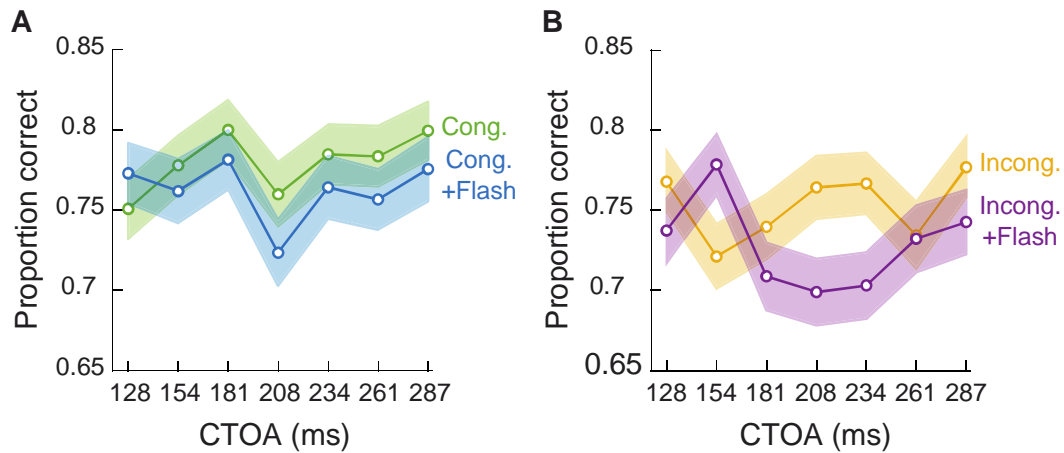

516

517 **Figure S2.** Time course of congruent **(A)** and incongruent **(B)** cue conditions at high temporal  
518 resolution. **(A)** As already showed in Fig. 2A, there is no clear difference between flash (blue) and  
519 no flash (green) trials in the congruent cue condition. The only indication of a stronger interference  
520 is when the CTOA is 208 ms, with performance recovering soon after. **(B)** A more clear rhythm  
521 pattern in the incongruent cue condition (yellow) emerges with higher CTOA sampling, suggesting  
522 that the probe was biasing attentional allocation. When the flash is present (purple), discrimination  
523 performance is altered following an almost antiphase pattern. Data are pooled together across  
524 participants to increase the confidence in the mean estimate. In all panels, the shaded area  
525 represents one standard error of the mean.
